# Supplementary material for: Walnut (J. regia) Agro-Residues as a Rich Source of Phenolic Compounds
Source: MDPI journal article supplement (doi:10.3390/biology10060535), 2021-06-15

Supplementary materials

Figure 1. MS<sup>1</sup> spectra of hydrojuglone β-D-glucopyranoside (naphthoquinone) in a negative ion mode.

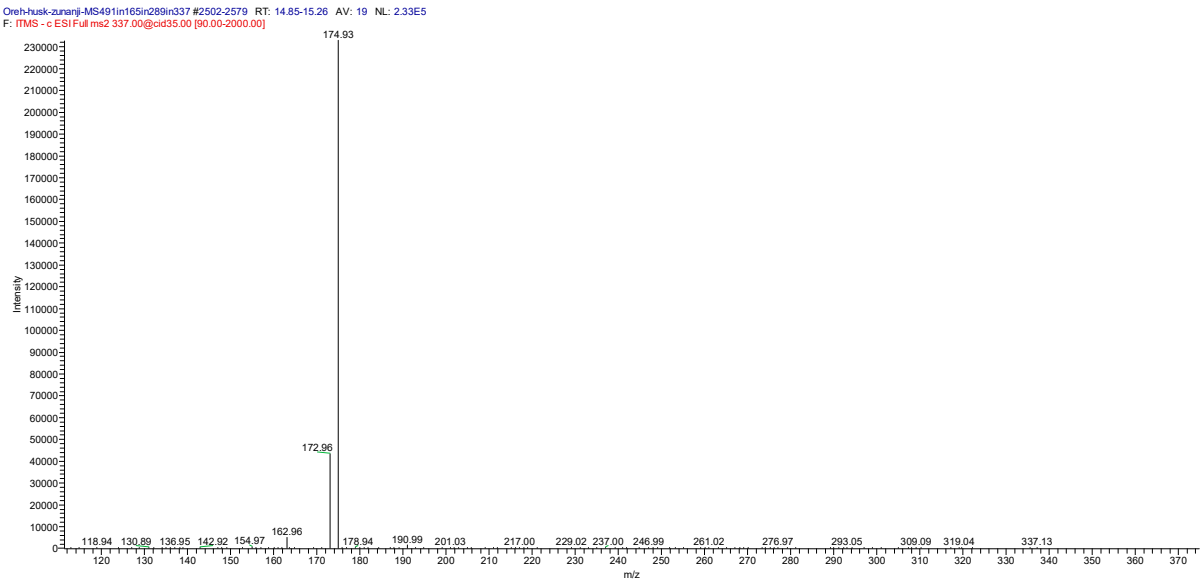

Figure 2. MS<sup>2</sup> spectra of hydrojuglone β-D-glucopyranoside (naphthoquinone) in a negative ion mode.

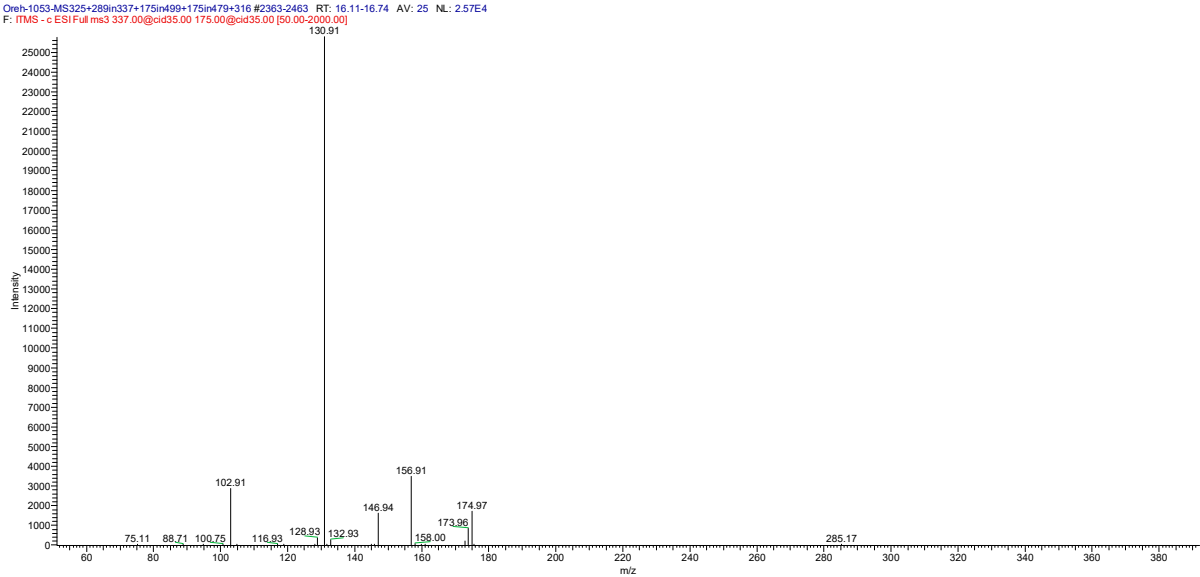

Figure 3. MS<sup>1</sup> spectra of gallic acid derivative 5 (hydroxybenzoic acid) in a negative ion mode.

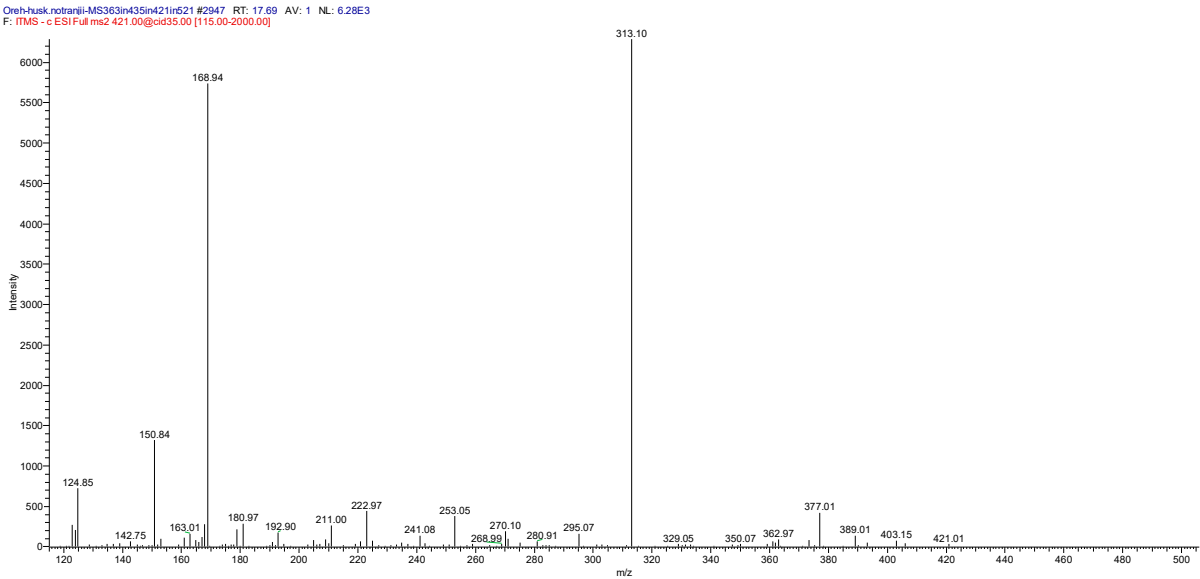

Figure 4. MS<sup>1</sup> spectra of (epi)catechin derivative 5 (flavanol) in a negative ion mode.

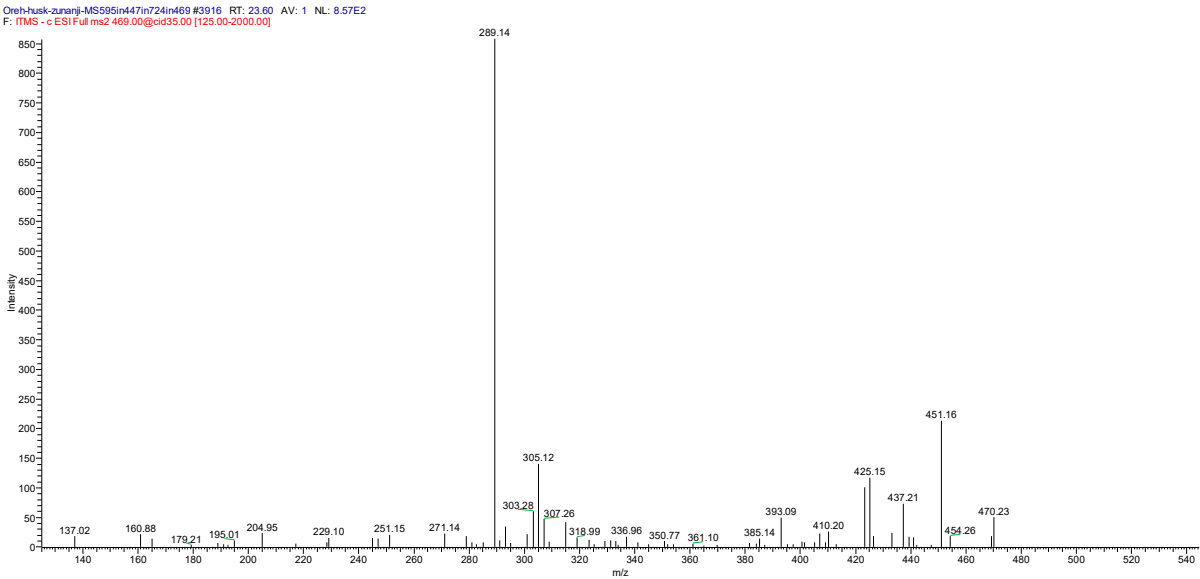

Figure 5. MS<sup>2</sup> spectra of (epi)catechin derivative 5 (flavanol) in a negative ion mode.

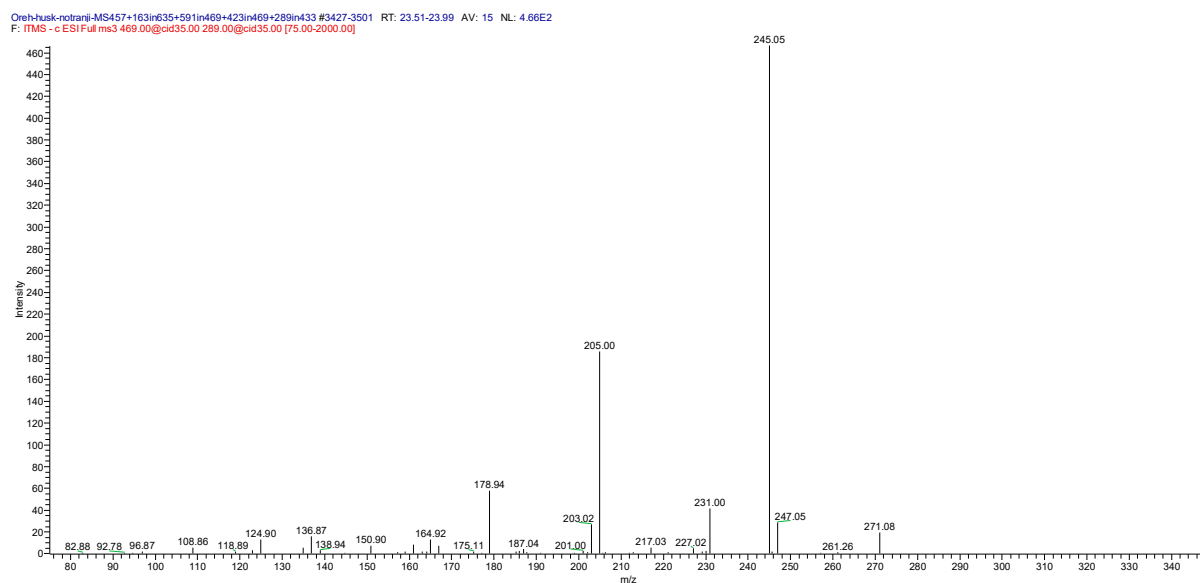

Figure 6. MS<sup>1</sup> spectra of santin (flavone) in a negative ion mode.

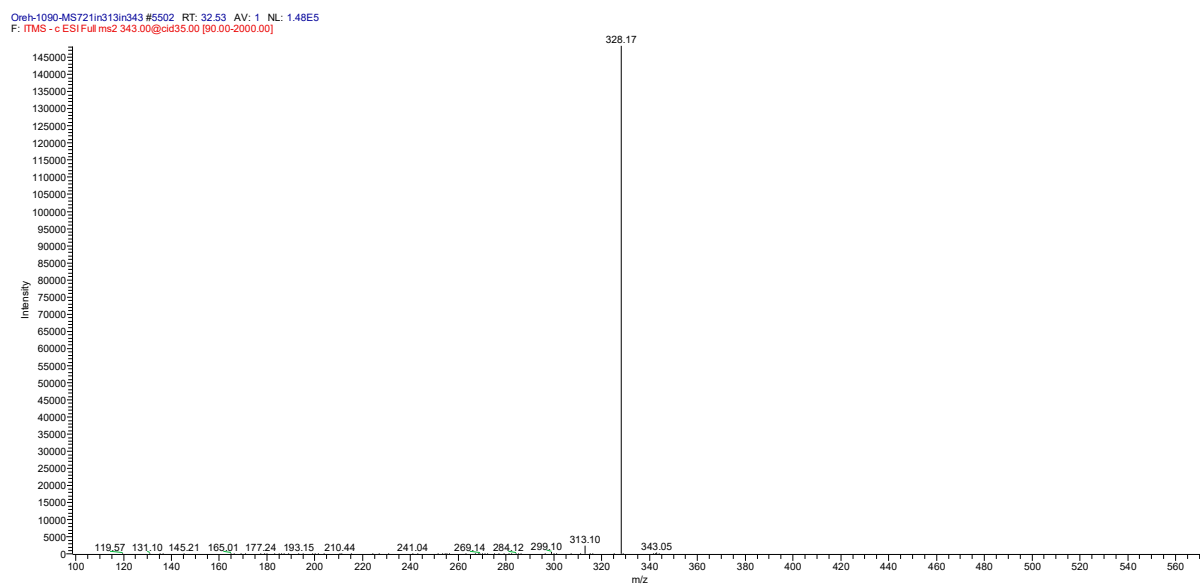

Figure 7. MS<sup>2</sup> spectra of santin (flavone) in a negative ion mode.

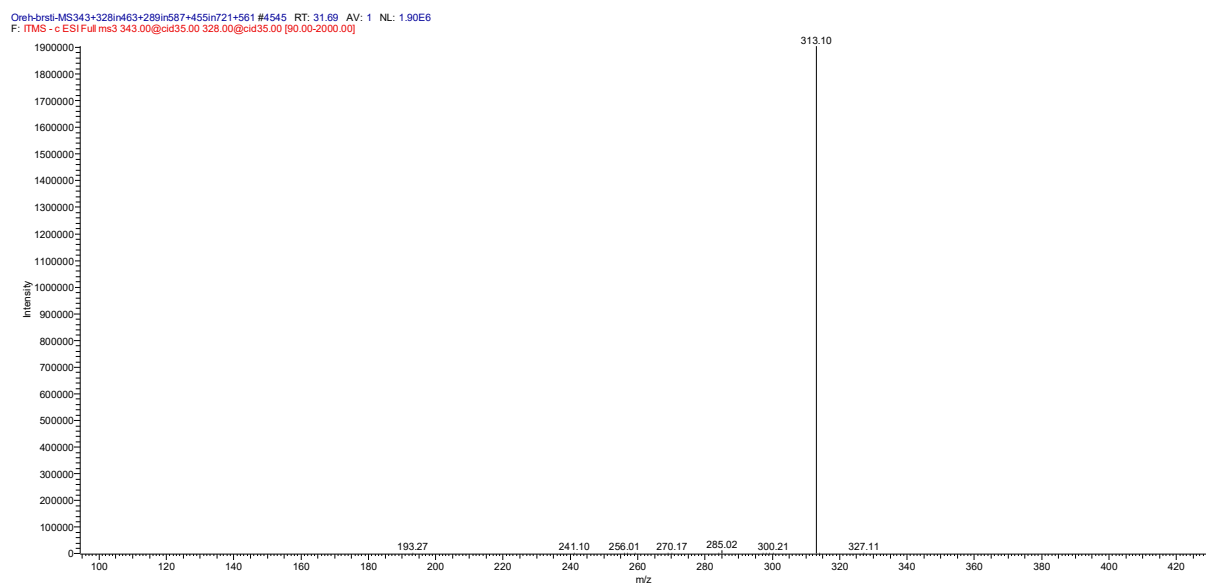

Figure 8. MS<sup>1</sup> spectra of quercetin-rhamnoside (flavonol) in a negative ion mode.

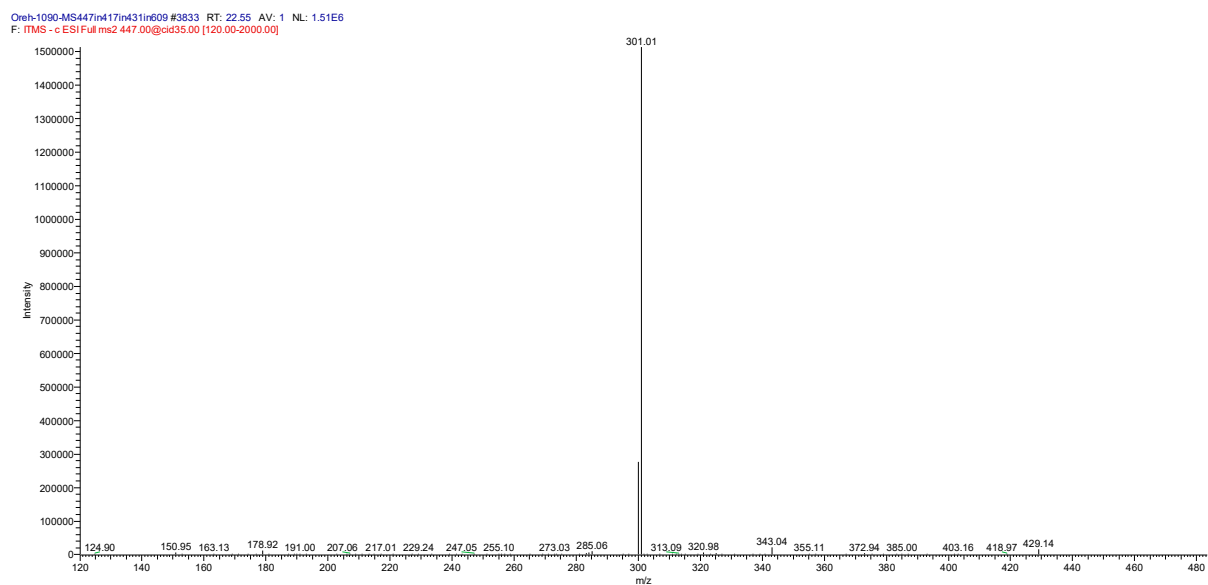

Figure 9. MS<sup>2</sup> spectra of quercetin-rhamnoside (flavonol) in a negative ion mode.

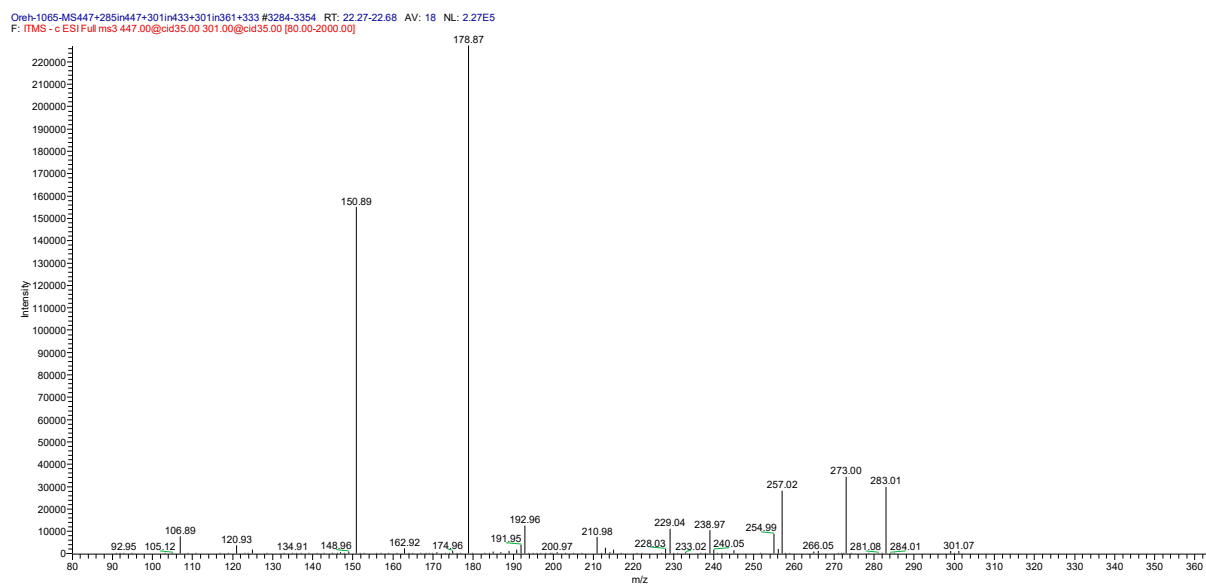

Figure 10. MS<sup>1</sup> spectra of *p*-coumaric acid derivative 4 (hydroxycinnamic acid) in a negative ion mode.

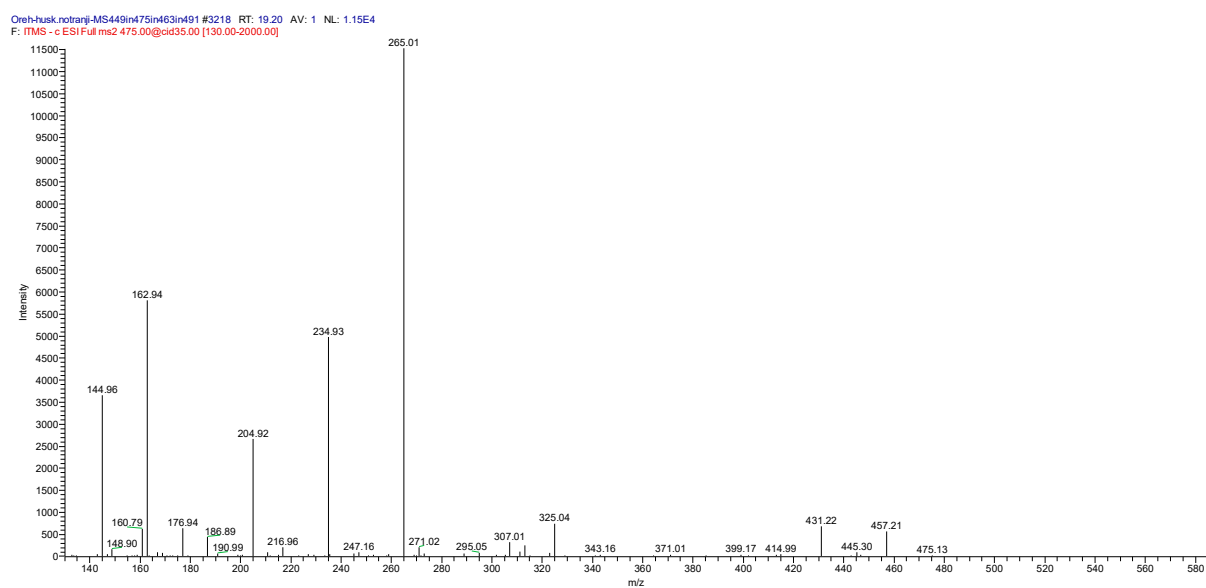

Figure 11. MS<sup>2</sup> spectra of *p*-coumaric acid derivative 4 (hydroxycinnamic acid) in a negative ion mode.

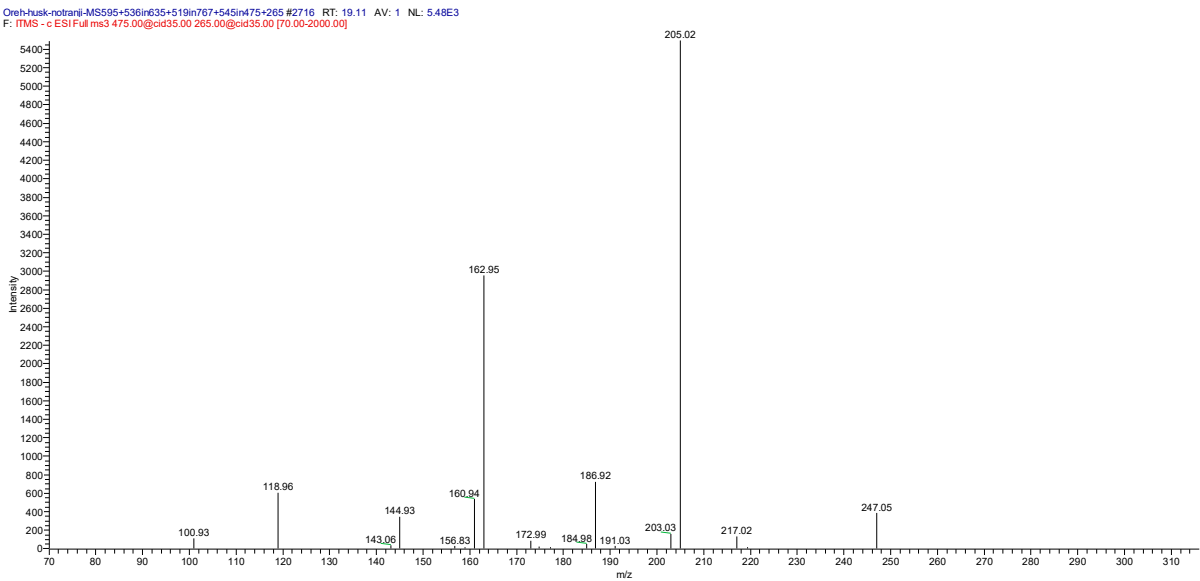

Supplement: s1 [file s1]
